# Supplementary material
Source: Springer Nature journal article supplement (https://www.springermedizin.de/resource/supplementary/13030_2013_166_MOESM1_ESM.pdf/9644878)

**A**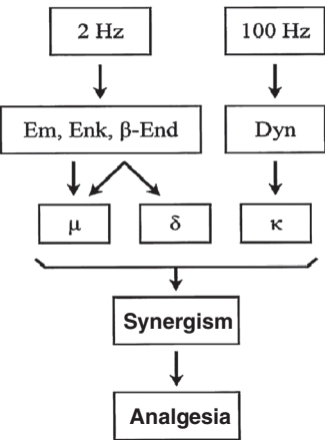**B**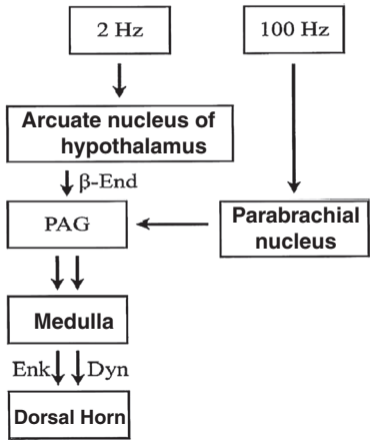

Supplement: MOESM1 [file 9644878]
